# Supplementary material
Source: PubMed Central journal article supplement (PMC2664356)

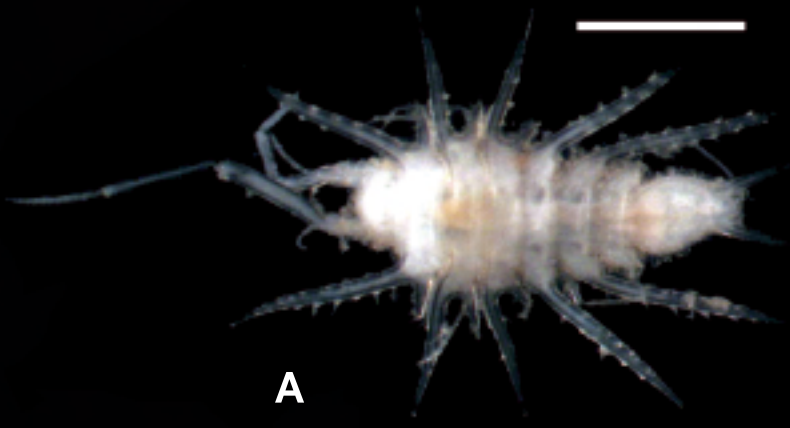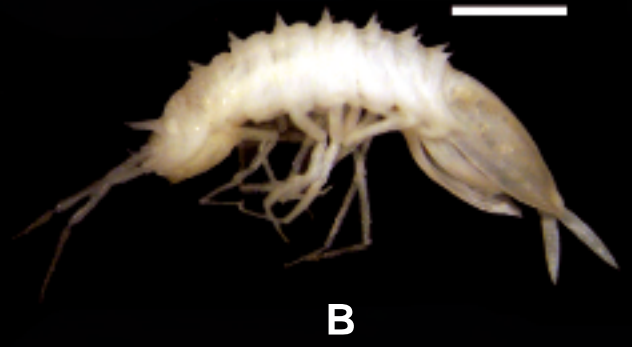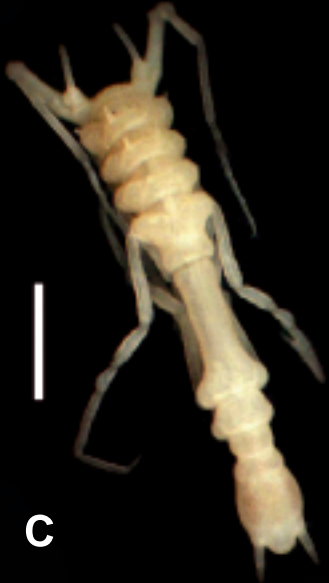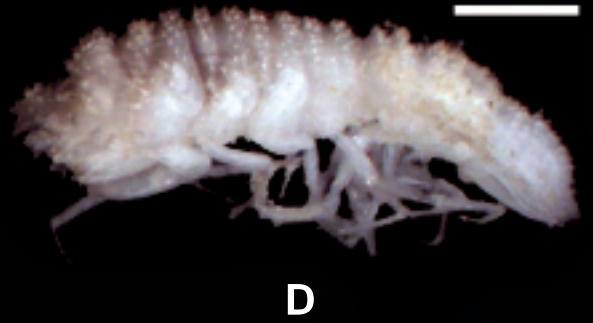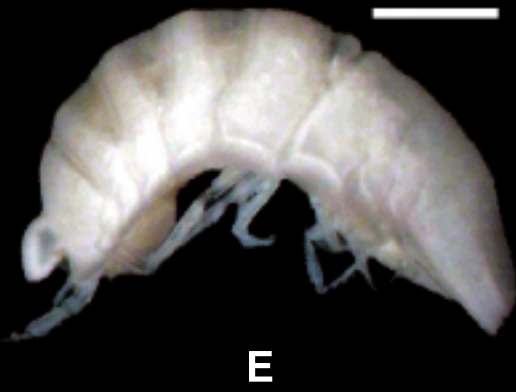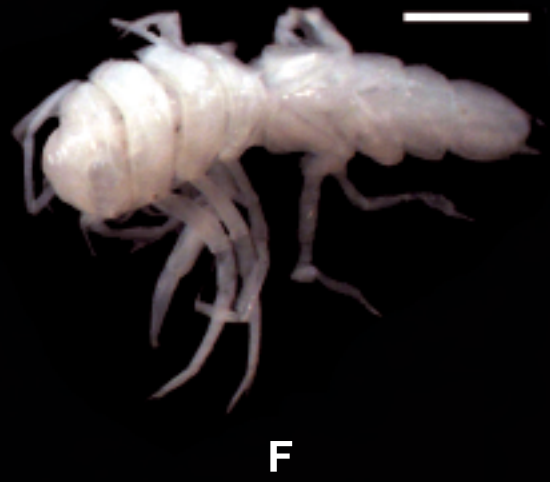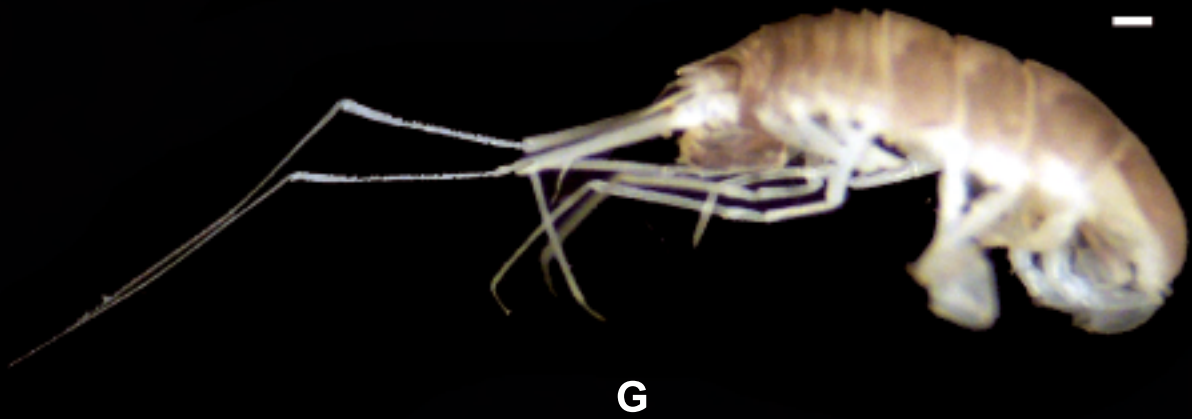

Supplement: rspb20081063s06.pdf [file rspb20081063s06.pdf]
